# Supplementary material for: Heteroatoms (Si, B, N, and P) doped 2D monolayer MoS2for NH3gas detection
Source: Royal Society of Chemistry journal article supplement (doi:10.1039/d2ra04028j), 2022-01-01
Supplement: d2ra04028j1.pdf [file d2ra04028j1.pdf]

## Electronic Supporting Information

# Heteroatom (Si, B, N, and P) doped 2D monolayer MoS<sub>2</sub> for NH<sub>3</sub> gas detection

Terkumbur E. Gber <sup>a,b</sup>, Hitler Louis <sup>a,c\*\*</sup>, Aniekan E. Owen <sup>a,c</sup>, Benjamin E. Etinwa <sup>a,b</sup>, Innocent Benjamin <sup>b</sup>, Fredrick C. Asogwa <sup>a,b</sup>, Muiyiwa M. Orosun <sup>d</sup>, and Ededet A. Eno <sup>a,b</sup>

<sup>a</sup>Computational and Bio-Simulation Research Group, University of Calabar, Calabar, Nigeria

<sup>b</sup>Department of Pure and Applied Chemistry, Faculty of Physical Sciences, University of Calabar, Calabar, Nigeria

<sup>c</sup>Department of Chemistry, Akwa-Ibom State University, Uyo, Nigeria

<sup>d</sup>Department of Physics, University of Ilorin, Ilorin, Nigeria

\*Corresponding authors' email: [louismuzong@gmail.com](mailto:louismuzong@gmail.com)

**Table S1. Global quantum descriptors (Ionization Potential, electron Affinity, chemical softness, chemical hardness, chemical potential, electrophilicity Index, and Femi level energy.**

| Surfaces                                  | IP      | EA     | $\sigma$ | $\eta$ | $\mu$   | $\omega$ | $E_{FL}$ |
|-------------------------------------------|---------|--------|----------|--------|---------|----------|----------|
| B@MoS <sub>2</sub> QD                     | 9.8067  | 6.4450 | 0.5949   | 1.6808 | -8.1259 | 55.4930  | 8.1259   |
| N@MoS <sub>2</sub> QD                     | 9.7017  | 6.3261 | 0.5925   | 1.6878 | -8.0139 | 54.1969  | 8.0139   |
| P@MoS <sub>2</sub> QD                     | 9.6369  | 6.2986 | 0.5991   | 1.6691 | -7.9678 | 52.9832  | 7.9678   |
| Si@MoS <sub>2</sub> QD                    | 7.9806  | 3.6357 | 0.4603   | 2.1724 | -5.8081 | 36.6427  | 5.8081   |
| MoS <sub>2</sub> QD                       | 7.1952  | 3.8847 | -0.6041  | 1.6553 | -5.5400 | 25.4011  | 5.5400   |
| B@MoS <sub>2</sub> _NH <sub>3</sub>       | 9.8336  | 5.8753 | 0.2526   | 1.9791 | -7.8544 | 15.5857  | 7.8544   |
| B@MoS <sub>2</sub> _NH <sub>3</sub> -SP   | 8.3862  | 7.2420 | 0.8739   | 0.5721 | -7.8141 | 53.3649  | 7.8141   |
| B@MoS <sub>2</sub> _NH <sub>3</sub> -SP1  | 8.2181  | 7.2858 | 1.0727   | 0.4661 | -7.7519 | 64.4625  | 7.7519   |
| B@MoS <sub>2</sub> _NH <sub>3</sub> -SP2  | 9.2578  | 6.6131 | 0.3781   | 1.3223 | -7.9354 | 23.8110  | 7.9354   |
| N@MoS <sub>2</sub> _NH <sub>3</sub>       | 10.4652 | 5.8765 | 0.2179   | 2.2943 | -8.1692 | 14.5438  | 8.1692   |
| N@MoS <sub>2</sub> _NH <sub>3</sub> -SP   | 8.9253  | 7.3062 | 0.6176   | 0.8095 | -8.1157 | 40.6822  | 8.1157   |
| N@MoS <sub>2</sub> _NH <sub>3</sub> -SP1  | 8.7013  | 7.3625 | 0.7469   | 0.6694 | -8.0319 | 48.1860  | 8.0319   |
| N@MoS <sub>2</sub> _NH <sub>3</sub> -SP2  | 9.8328  | 6.7269 | 0.3219   | 1.5529 | -8.2798 | 22.0732  | 8.2798   |
| P@MoS <sub>2</sub> _NH <sub>3</sub>       | 9.7658  | 5.8548 | 0.2556   | 1.9555 | -7.8103 | 15.5972  | 7.8103   |
| P@MoS <sub>2</sub> _NH <sub>3</sub> -SP   | 8.7699  | 7.7859 | 1.1574   | 0.432  | -8.2779 | 79.3097  | 8.2779   |
| P@MoS <sub>2</sub> _NH <sub>3</sub> -SP2  | 9.5484  | 7.3470 | 0.4542   | 1.1007 | -8.4477 | 32.4173  | 8.4477   |
| Si@MoS <sub>2</sub> _NH <sub>3</sub>      | 7.7089  | 3.2465 | 0.2240   | 2.2312 | -5.4777 | 7.7240   | 5.4777   |
| Si@MoS <sub>2</sub> _NH <sub>3</sub> -SP  | 5.8626  | 4.9701 | 1.1205   | 0.4462 | -5.4163 | 32.8734  | 5.4163   |
| Si@MoS <sub>2</sub> _NH <sub>3</sub> -SP1 | 5.7203  | 5.0120 | 1.4120   | 0.3541 | -5.3661 | 42.9316  | 5.3661   |
| Si@MoS <sub>2</sub> _NH <sub>3</sub> -SP2 | 6.5753  | 4.4528 | 0.4733   | 1.0562 | -5.5140 | 14.3932  | 5.5140   |
| S@MoS <sub>2</sub> _NH <sub>3</sub>       | 7.4605  | 3.4626 | 0.2501   | 1.9989 | -5.4615 | 7.4610   | 5.4615   |

|                                         |        |        |        |        |         |         |        |
|-----------------------------------------|--------|--------|--------|--------|---------|---------|--------|
| S@MoS <sub>2</sub> NH <sub>3</sub> -SP  | 5.9628 | 4.8150 | 0.8712 | 0.5739 | -5.3889 | 38.8342 | 5.3889 |
| S@MoS <sub>2</sub> NH <sub>3</sub> -SP1 | 5.7995 | 4.8591 | 1.0633 | 0.4702 | -5.3293 | 30.2014 | 5.3293 |
| S@MoS <sub>2</sub> NH <sub>3</sub> -SP2 | 6.8795 | 4.1554 | 0.3671 | 1.3620 | -5.5174 | 11.1753 | 5.5174 |

**Table S2:** Donor (i), Occupancy, Acceptor (j), Stabilization energies, Hybrid orbital and Atomic Orbital of the studied systems.

| Surface                                  | Donor (i)                                | Occupancy                                | Acceptor (i)                              | Occupancy                                 | E(2)/Kcal/mol | E(j) – E(i) | F(j,i) | Hybrid                | Atomic orbital                |
|------------------------------------------|------------------------------------------|------------------------------------------|-------------------------------------------|-------------------------------------------|---------------|-------------|--------|-----------------------|-------------------------------|
| <b>B@MoS<sub>2</sub>_QD</b>              | $\sigma\text{Mo}_1 - \text{B}_{36}$      | 1.37265                                  | $\sigma^*\text{Mo}_1 - \text{Mo}_{13}$    | 0.53403                                   | 3836.88       | 0.09        | 0.525  | spd <sup>41.99%</sup> | s(23.81) p(32.82%) d(43.37%)  |
|                                          | $\sigma\text{Mo}_1 - \text{B}_{36}$      | 1.37265                                  | $\sigma^*\text{S}_3 - \text{M}_{04}$      | 0.29045                                   | 1238.31       | 0.02        | 0.161  | spd <sup>41.99%</sup> | s(23.81) p(32.82%) d(43.37%)  |
|                                          | $\sigma\text{Mo}_1 - \text{B}_{36}$      | 1.37265                                  | $\sigma^*\text{Mo}_1 - \text{S}_{11}$     | 0.21771                                   | 995.35        | 0.09        | 0.299  | spd <sup>71.52%</sup> | s(12.02%) p(41.53%) d(46.45%) |
|                                          | $\pi\text{Mo}_4 - \text{Mo}_5$           | 1.21786                                  | $\sigma^*\text{Mo}_5 - \text{Mo}_{15}$    | 0.46915                                   | 1663.11       | 0.24        | 0.612  | spd <sup>69.55%</sup> | s(7.61%) p(33.11%) d(59.28%)  |
|                                          | LP (1)Mo <sub>15</sub>                   | 0.41943                                  | $\sigma^*\text{Mo}_5 - \text{Mo}_{15}$    | 0.46915                                   | 5389.14       | 0.02        | 0.443  | spd <sup>69.55%</sup> | s(7.61%) p(33.11%) d(59.28%)  |
|                                          | $\sigma^*\text{Mo}_1 - \text{S}_2$       | 0.16176                                  | $\sigma\text{Mo}_1 - \text{B}_{36}$       | 1.37265                                   | 5180.34       | 0.02        | 0.340  | spd <sup>41.99%</sup> | s(23.81) p(32.82%) d(43.37%)  |
|                                          | $\pi^*\text{Mo}_1 - \text{S}_3$          | 0.20751                                  | $\sigma\text{Mo}_1 - \text{B}_{36}$       | 1.37265                                   | 2365.61       | 0.05        | 0.333  | spd <sup>67.40%</sup> | s(0.19%) p(34.78%) d(65.03)   |
|                                          | $\sigma^*\text{Mo}_1 - \text{Mo}_{13}$   | 0.53403                                  | $\sigma^*\text{Mo}_1 - \text{S}_9$        | 0.20065                                   | 1876.59       | 0.01        | 0.217  | spd <sup>73.45%</sup> | s(13.75%) p(40.72%) d(45.53%) |
|                                          | $\sigma^*\text{M}_{04} - \text{Mo}_5$    | 0.41840                                  | $\pi^*\text{Mo}_4 - \text{Mo}_5$          | 0.41190                                   | 4098.73       | 0.04        | 0.568  | spd <sup>44.96%</sup> | s(13.83%) p(26.23%) d(59.94)  |
|                                          | $\sigma\text{Mo}_4 - \text{Mo}_5$        | 1.46561                                  | $\sigma^*\text{Mo}_5 - \text{Mo}_{15}$    | 0.46915                                   | 1347.51       | 0.07        | 0.412  | spd <sup>66.59%</sup> | s(8.60%) p(2.80%) d(88.60%)   |
|                                          | $\pi^*\text{Mo}_4 - \text{Mo}_5$         | 0.41190                                  | $\sigma^*\text{Mo}_5 - \text{Mo}_{15}$    | 0.46915                                   | 5797.69       | 0.03        | 0.553  | spd <sup>66.59%</sup> | s(8.60%) p(2.80%) d(88.60%)   |
|                                          | $\sigma^*\text{Mo}_5 - \text{Mo}_6$      | 1.21786                                  | $\sigma^*\text{Mo}_4 - \text{Mo}_5$       | 0.41840                                   | 2457.43       | 0.02        | 0.397  | spd <sup>44.96%</sup> | s(13.83%) p(26.23%) d(59.94)  |
| <b>N@MoS<sub>2</sub>_QD</b>              | $\pi^*\text{Mo}_{20} - \text{S}_{28}$    | 0.68619                                  | $\sigma\text{Mo}_{19} - \text{Mo}_{20}$   | 0.32692                                   | 410.29        | 0.02        | 0.082  | spd <sup>49.03%</sup> | s(9.92%) p(36.66%) d(53.43%)  |
|                                          | $\sigma^*\text{M}_{019} - \text{S}_{27}$ | 0.16853                                  | $\sigma^*\text{Mo}_{19} - \text{S}_{28}$  | 0.7865                                    | 191.68        | 0.01        | 0.107  | spd <sup>61.85%</sup> | s(13.63%) p(34.11%) d(52.26%) |
|                                          | $\sigma^*\text{Mo}_{18} - \text{S}_{34}$ | 0.21025                                  | $\sigma^*\text{Mo}_{18} - \text{S}_{27}$  | 0.20236                                   | 757.20        | 0.01        | 0.17   | spd <sup>72.63%</sup> | s(19.27%) p(41.60%) d(39.13%) |
|                                          | $\sigma^*\text{Mo}_{18} - \text{S}_{34}$ | 0.21025                                  | $\sigma^*\text{Mo}_{15} - \text{Mo}_{18}$ | 0.31210                                   | 405.44        | 0.05        | 0.249  | Spd <sup>37.77</sup>  | s(19.05%) p(14.97%) d(65.97%) |
|                                          | $\sigma^*\text{Mo}_{18} - \text{S}_{31}$ | 0.20477                                  | $\sigma^*\text{Mo}_{18} - \text{Mo}_{19}$ | 0.25756                                   | 448.14        | 0.02        | 0.188  | spd <sup>67.90%</sup> | s(13.49%) p(0.90%) d(85.61%)  |
|                                          | $\sigma^*\text{M}_{018} - \text{S}_{27}$ | 0.20236                                  | $\sigma^*\text{Mo}_{15} - \text{Mo}_{18}$ | 0.31210                                   | 484.59        | 0.04        | 0.243  | spd <sup>37.77%</sup> | s(19.05%) p(14.97%) d(65.97%) |
|                                          | $\sigma^*\text{Mo}_{14} - \text{S}_{30}$ | 0.22579                                  | $\sigma^*\text{S}_{12} - \text{M}_{014}$  | 0.19580                                   | 332.11        | 0.02        | 0.138  | spd <sup>38.57%</sup> | s(19.92%) p(79.89%) d(0.19%)  |
|                                          | $\sigma^*\text{Mo}_8 - \text{S}_{12}$    | 0.21025                                  | $\sigma^*\text{Mo}_8 - \text{S}_{10}$     | 0.20236                                   | 757.20        | 0.01        | 0.175  | spd <sup>72.63%</sup> | s(19.27%) p(41.60%) d(39.13%) |
|                                          | $\sigma^*\text{Mo}_8 - \text{S}_{12}$    | 0.21025                                  | $\sigma^*\text{Mo}_8 - \text{S}_{12}$     | 0.23843                                   | 405.44        | 0.01        | 0.175  | Spd <sup>64.19%</sup> | s(2.58%) p(1.73%) d(95.69%)   |
|                                          | $\sigma^*\text{Mo}_8 - \text{S}_{10}$    | 0.20236                                  | $\sigma^*\text{Mo}_8 - \text{M}_{013}$    | 0.31210                                   | 484.59        | 0.04        | 0.234  | spd <sup>62.23%</sup> | s(17.27%) p(5.22%) d(77.51%)  |
|                                          | $\sigma^*\text{Mo}_8 - \text{S}_9$       | 0.20549                                  | $\sigma^*\text{Mo}_8 - \text{Mo}_{14}$    | 0.27945                                   | 300.03        | 0.03        | 0.160  | Spd <sup>72.00%</sup> | s(13.49%) p(0.90%) d(85.61%)  |
|                                          | $\sigma^*\text{M}_{05} - \text{S}_{24}$  | 0.19917                                  | $\sigma^*\text{Mo}_5 - \text{Mo}_{15}$    | 0.35611                                   | 934.35        | 0.02        | 0.215  | spd <sup>50.76%</sup> | s(25.11%) p(15.35%) d(59.54%) |
|                                          | $\sigma^*\text{Mo}_5 - \text{Mo}_{15}$   | 0.35611                                  | $\sigma^*\text{Mo}_5 - \text{S}_6$        | 0.21371                                   | 1591.04       | 0.01        | 0.251  | Spd <sup>69.59%</sup> | s((10.89%)p(30.93%) d(58.18%) |
|                                          | $\sigma^*\text{Mo}_{15} - \text{M}_{18}$ | 0.31210                                  | $\sigma^*\text{Mo}_{18} - \text{Mo}_{19}$ | 0.257756                                  | 775.46        | 0.10        | 0.268  | Spd <sup>67.90%</sup> | s(13.49%) p(0.90%) d(85.61%)  |
|                                          | $\sigma\text{Mo}_8 - \text{Mo}_{13}$     | 0.31210                                  | $\sigma\text{Mo}_8 - \text{Mo}_{14}$      | 0.27945                                   | 966.99        | 0.07        | 0.254  | spd <sup>72.00%</sup> | s(13.49%) p(0.90%) d(85.61)   |
|                                          | <b>P@MoS<sub>2</sub>_QD</b>              | $\sigma^*\text{Mo}_{17} - \text{S}_{33}$ | 0.33451                                   | $\sigma^*\text{Mo}_{17} - \text{Mo}_{20}$ | 0.35823       | 342.24      | 0.02   | 0.146                 | spd <sup>55.13%</sup>         |
| $\sigma^*\text{Mo}_{14} - \text{S}_{30}$ |                                          | 0.23935                                  | LP*Mo <sub>14</sub>                       | 0.36994                                   | 312.11        | 0.03        | 0.155  | spd                   | s(13.52%) p(78.27%) d(8.21%)  |
| $\sigma^*\text{Mo}_{14} - \text{S}_{29}$ |                                          | 0.32049                                  | LP*Mo <sub>14</sub>                       | 0.36994                                   | 205.58        | 0.03        | 0.118  | spd                   | s(13.52%) p(78.27%) d(8.21%)  |
| $\sigma^*\text{Mo}_{14} - \text{S}_{23}$ |                                          | 0.35261                                  | LP*Mo <sub>14</sub>                       | 0.36994                                   | 266.74        | 0.04        | 0.174  | spd                   | s(13.52%) p(78.27%) d(8.21%)  |

|                                         |                            |         |                            |         |         |      |       |                       |                                 |
|-----------------------------------------|----------------------------|---------|----------------------------|---------|---------|------|-------|-----------------------|---------------------------------|
|                                         | $\sigma^*Mo_{14} - S_{22}$ | 0.31698 | $LP^*Mo_{14}$              | 0.36994 | 332.32  | 0.02 | 0.121 | Spd                   | s(13.52%) p(78.27%) d(8.21%)    |
|                                         | $\sigma^*Mo_8 - Mo_{14}$   | 0.36465 | $\sigma^*Mo_8 - S_9$       | 0.18163 | 304.80  | 0.03 | 0.151 | spd <sup>64.90%</sup> | s(16.55%) p(30.43%) d(53.02%)   |
|                                         | $\sigma^*Mo_8 - Mo_{14}$   | 0.36465 | $\sigma^*Mo_8 - S_{11}$    | 0.18180 | 270.69  | 0.03 | 0.157 | spd <sup>65.14</sup>  | s(15.83%) p(31.94%) d(52.23%)   |
|                                         | $\sigma^*Mo_8 - S_{14}$    | 0.36465 | $\sigma^*Mo_{14} - S_{29}$ | 0.32049 | 232.24  | 0.03 | 0.135 | spd <sup>61.57%</sup> | s(9.02%) p(37.71%) d(53.27%)    |
|                                         | $\sigma^*Mo_5 - S_{31}$    | 0.25294 | $\sigma^*Mo_5 - Mo_{15}$   | 0.42442 | 416.58  | 0.01 | 0.104 | spd <sup>53.67%</sup> | s(28.01%) p(6.05%) d(65.94%)    |
|                                         | $\sigma^*Mo_4 - S_{21}$    | 0.24165 | $\sigma^*Mo_{14} - S_{22}$ | 0.31698 | 228.66  | 0.02 | 0.135 | spd <sup>61.79%</sup> | s(8.57%) p(39.16%) d(52.28%)    |
|                                         | $\sigma^*Mo_1 - Mo_{13}$   | 0.37352 | $\sigma^*Mo_1 - S_3$       | 0.15584 | 583.69  | 0.02 | 0.193 | spd <sup>57.74%</sup> | s(16.41%) p(13.56%) d(70.03%)   |
|                                         | $\sigma^*Mo_1 - Mo_{13}$   | 0.37352 | $\sigma^*Mo_1 - S_3$       | 0.15584 | 454.73  | 0.03 | 0.193 | spd <sup>57.74%</sup> | s(16.41%) p(13.56%) d(70.03%)   |
|                                         | $LP^*Mo_{16}$              | 0.38276 | $LP^*Mo_{14}$              | 0.36994 | 655.03  | 0.02 | 0.149 | spd                   | s(13.52%) p(78.27%) d(8.21%)    |
| <b>Si@MoS<sub>2</sub>_QD</b>            | $\pi^*Mo_{14} - S_{30}$    | 0.19163 | $\pi^*Mo_{14} - S_{23}$    | 0.16096 | 1640.59 | 0.03 | 0.273 | spd <sup>64.82%</sup> | s(14.91%) p(36.06%) d(49.03%)   |
|                                         | LP Si36                    | 0.21354 | $LP^*(2) Mo_{13}$          | 0.30269 | 1044.65 | 0.05 | 0.331 | spd                   | s(0.12%) p(91.39%) d(8.49%)     |
|                                         | $\sigma Mo_8 - Mo_{13}$    | 0.44258 | $\sigma Mo_8 - Mo_{14}$    | 0.24825 | 599.08  | 0.11 | 0.244 | spd <sup>39.20%</sup> | s(7.18%) p(92.63%) d(0.19%)     |
|                                         | $LP^*Mo_{16}$              | 0.11019 | $LP^*Mo_{20}$              | 0.11019 | 572.35  | 0.02 | 0.183 | spd                   | S(0.78%) p(90.95%) d(8.28%)     |
|                                         | $\sigma^*Mo_1 - S_2$       | 0.19660 | $\sigma^*Mo_1 - Mo_{13}$   | 0.46476 | 574.75  | 0.02 | 0.193 | spd <sup>53.12%</sup> | s(26.73%) p(3.73%) d(69.54%)    |
|                                         | $\sigma^*Mo_8 - S_{12}$    | 0.28876 | $\sigma^*Mo_8 - Mo_{13}$   | 0.44258 | 549.09  | 0.04 | 0.204 | spd <sup>43.86%</sup> | s(17.80%) p(4.47%) d(77.73%)    |
|                                         | $\sigma^*Mo_{19} - S_{27}$ | 0.24825 | $\sigma^*Mo_{19} - S_{28}$ | 0.16096 | 553.35  | 0.01 | 0.148 | spd <sup>64.82%</sup> | s(14.91%) p(36.06%) d(49.03%)   |
|                                         | $LP^*(2) Mo_1$             | 0.14019 | $\sigma^*Mo_1 - Mo_{13}$   | 0.46476 | 508.71  | 0.04 | 0.141 | spd <sup>53.12%</sup> | s(26.73%) p(3.73%) d(69.54%)    |
|                                         | LPSi <sub>36</sub>         | 0.21354 | $LP^*(3) Mo_{15}$          | 0.29182 | 446.11  | 0.15 | 0.363 | spd                   | s(17.46%) p(76.72%) d(5.82%)    |
|                                         | $LP^*(2) Mo_1$             | 0.12019 | $\sigma^*Mo_1 - S_2$       | 0.19660 | 358.71  | 0.01 | 0.141 | spd <sup>69.56%</sup> | s(17.36%) p(38.91%) d(43.72%)   |
| <b>MoS<sub>2</sub>_QD</b>               | $LP^*(3) Mo_4$             | 0.34154 | $LP^* Mo_{13}$             | 0.38483 | 700.05  | 0.01 | 0.143 | Spd                   | s( 0.05%)p( 87.20%)d( 12.75%)   |
|                                         | $\pi Mo_1 - Mo_8$          | 0.65040 | $\sigma^*Mo_1 - Mo_8$      | 0.36176 | 621.20  | 0.09 | 0.257 | Spd <sup>50.00%</sup> | s( 14.17%)p( 24.84%)d( 60.98%)  |
| <b>B@MoS<sub>2</sub>_NH<sub>3</sub></b> | $LP^*(2) Mo_{16}$          | 0.34380 | $LP^*(2) Mo_5$             | 0.10959 | 4107.17 | 0.02 | 0.508 | Spd                   | s( 0.91%)p( 92.76%)d( 6.34%)    |
|                                         | $\sigma^*Mo_8 - Mo_{14}$   | 0.59437 | $\sigma^*Mo_8 - S_9$       | 0.27539 | 1353.59 | 0.02 | 0.221 | Spd <sup>33.17%</sup> | s( 13.62%)p( 25.15%)d( 61.23%)  |
| <b>N@MoS<sub>2</sub>_NH<sub>3</sub></b> | $\sigma^*Mo_8 - S_{11}$    | 0.28146 | $\sigma^*Mo_8 - S_9$       | 0.24751 | 1892.76 | 0.02 | 0.312 | Spd <sup>62.86%</sup> | s( 25.54%)p( 7.38%)d( 67.08%)   |
|                                         | $\sigma^*Mo_8 - S_{11}$    | 0.28146 | $LP^* Mo_{14}$             | 0.35384 | 1091.40 | 0.02 | 0.198 | Spd                   | s( 0.90%)p( 89.95%)d( 9.15%)    |
| <b>P@MoS<sub>2</sub>_NH<sub>3</sub></b> | $LP Mo_{16}$               | 0.38509 | $LP^* Mo_{15}$             | 0.36750 | 1012.07 | 0.02 | 0.201 | Spd                   | s( 10.22%)p( 80.47%)d( 9.32%)   |
|                                         | $\sigma Mo_8 - S_9$        | 1.81052 | $\pi Mo_1 - S_9$           | 1.86390 | 774.80  | 0.15 | 0.346 | Spd <sup>41.87%</sup> | s( 12.41%)p( 10.15%)d( 77.44%)  |
| <b>Si@MoS<sub>2</sub>_NH</b>            | $\sigma^*Mo_{20} - S_{28}$ | 0.39827 | $LPMo_{20}$                | 0.40970 | 645.69  | 0.04 | 0.216 | Spd                   | s( 8.84%)p ( 65.52%)d ( 25.64%) |
| 3                                       | $\sigma^*Mo_{18} - S_{34}$ | 0.18666 | $\sigma^*Mo_{18} - S_{24}$ | 0.32422 | 418.95  | 0.02 | 0.177 | spd <sup>62.61%</sup> | s( 16.58%)p ( 8.07%)d ( 75.36%) |
| <b>S@MoS<sub>2</sub>_NH<sub>3</sub></b> | $LP^* Mo_{13}$             | 0.35435 | $LP^*(2) Mo_1$             | 0.11457 | 477.23  | 0.01 | 0.132 | Spd                   | s( 1.29%)p( 90.54%)d( 8.18%)    |
|                                         | $LP^* Mo_8$                | 0.17664 | $\sigma^*Mo_8 - S_{11}$    | 0.25851 | 449.27  | 0.01 | 0.133 | spd <sup>59.26%</sup> | s(8.61%) p(21.06%) d (70.33%)   |
